# Supplementary material for: Binding mode prediction and identification of new lead compounds from natural products as renin and angiotensin converting enzyme inhibitors
Source: Royal Society of Chemistry journal article supplement (doi:10.1039/c4ra00856a), 2014-01-01
Supplement: c4ra00856a1.pdf [file c4ra00856a1.pdf]

Supplementary data

Table S1: Structure of the natural compounds considered for the studies

| Comp Code | Structure                                                                           | Reference |
|-----------|-------------------------------------------------------------------------------------|-----------|
| Nat-1     | 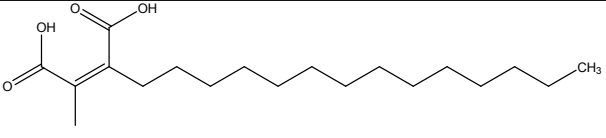   | 1, 2      |
| Nat-2     |    | 1, 2      |
| Nat-3     |   | 1, 2      |
| Nat-4     |  | 1, 2      |
| Nat-5     |  | 1, 2      |

|        |                                                                                     |   |
|--------|-------------------------------------------------------------------------------------|---|
| Nat-6  | 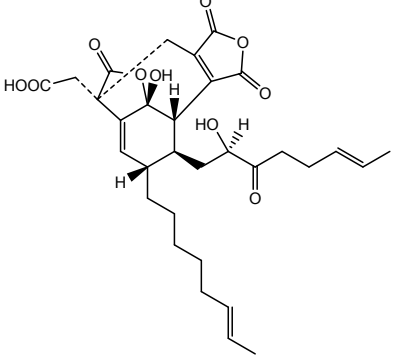   | 1 |
| Nat-7  |   | 1 |
| Nat-8  |  | 3 |
| Nat-9  |  | 3 |
| Nat-10 |  | 4 |

|        |                                                                                     |     |
|--------|-------------------------------------------------------------------------------------|-----|
| Nat-11 | 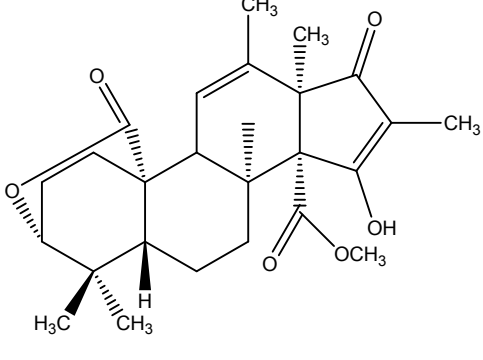   | 5   |
| Nat-12 |    | 5,6 |
| Nat-13 |   | 5,6 |
| Nat-14 |  | 5,6 |
| Nat-15 |  | 7,8 |

|        |                                                                                                                                                                                                                                                                                                      |     |
|--------|------------------------------------------------------------------------------------------------------------------------------------------------------------------------------------------------------------------------------------------------------------------------------------------------------|-----|
| Nat-16 | 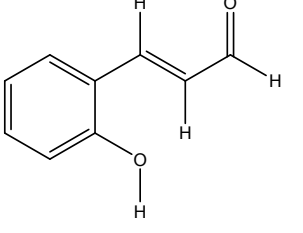 <p>Chemical structure of 2-hydroxy-3-phenylacrylaldehyde, showing a benzene ring attached to a propenal chain with a hydroxyl group at the 2-position.</p>                                                         | 9   |
| Nat-17 |  <p>Chemical structure of a bicyclic natural product, featuring a seven-membered ring fused to a five-membered ring containing an oxygen atom. It has a methyl group, a vinyl group, and a propenal side chain.</p> | 10  |
| Nat-18 |  <p>Chemical structure of a bicyclic natural product, similar to Nat-17 but with a different ring fusion and stereochemistry.</p>                                                                                   | 10  |
| Nat-19 |  <p>Chemical structure of a complex bicyclic natural product, featuring a bicyclic core with multiple methyl groups, hydroxyl groups, and a propenal side chain.</p>                                               | 9   |
| Nat-20 |  <p>Chemical structure of a complex bicyclic natural product, featuring a bicyclic core with multiple methyl groups, hydroxyl groups, and a propenal side chain.</p>                                              | 1,9 |
| Nat-21 |  <p>Chemical structure of a polycyclic natural product, featuring a complex fused ring system with multiple carbonyl groups and a furan ring.</p>                                                                 | 11  |

|        |                                                                                     |     |
|--------|-------------------------------------------------------------------------------------|-----|
| Nat-22 | 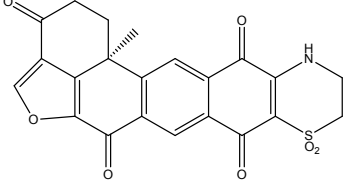   | 11  |
| Nat-23 |    | 11  |
| Nat-24 |    | 11  |
| Nat-25 |   | 11  |
| Nat-26 |  | 11  |
| Nat-27 |  | 1,8 |

|        |                                                                                     |       |
|--------|-------------------------------------------------------------------------------------|-------|
| Nat-28 | 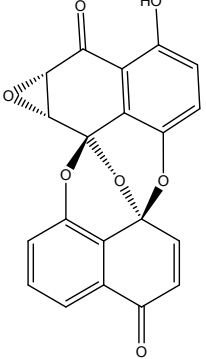   | 1,2,8 |
| Nat-29 |    | 1     |
| Nat-30 |    | 1     |
| Nat-31 |  | 12    |
| Nat-32 |  | 12    |
| Nat-33 |  | 2     |

|        |                                                                                     |    |
|--------|-------------------------------------------------------------------------------------|----|
| Nat-34 | 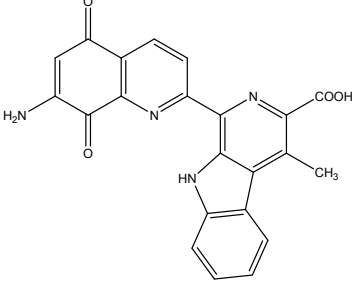   | 12 |
| Nat-35 |    | 2  |
| Nat-36 |   | 2  |
| Nat-37 |  | 2  |
| Nat-38 |  | 2  |

|        |                                                                                     |   |
|--------|-------------------------------------------------------------------------------------|---|
| Nat-39 | 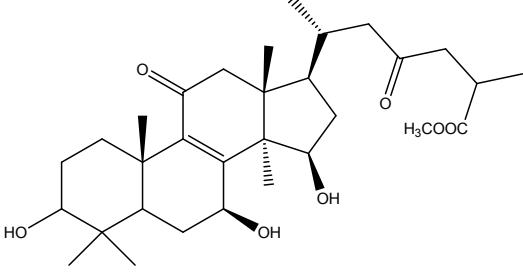   | 2 |
| Nat-40 |    | 2 |
| Nat-41 |   | 2 |
| Nat-42 |  | 2 |



|        |                                                                                     |    |
|--------|-------------------------------------------------------------------------------------|----|
| Nat-43 | 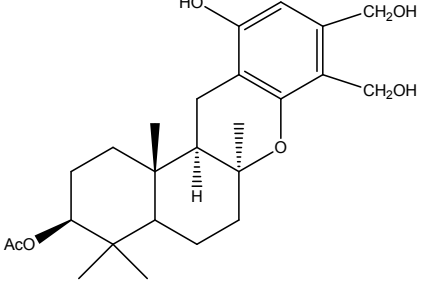   | 2  |
| Nat-44 |    | 2  |
| Nat-45 |    | 2  |
| Nat-46 |   | 2  |
| Nat-47 |  | 2  |
| Nat-48 |  | 11 |

|        |                                                                                     |    |
|--------|-------------------------------------------------------------------------------------|----|
| Nat-49 | 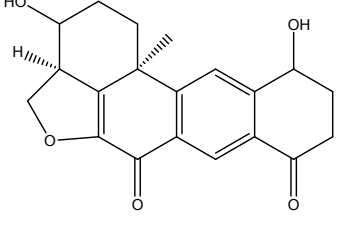   | 11 |
| Nat-50 |    | 2  |
| Nat-51 |   | 13 |
| Nat-52 |  | 14 |
| Nat-53 |  | 14 |
| Nat-54 |  | 14 |

|        |                                                                                     |    |
|--------|-------------------------------------------------------------------------------------|----|
| Nat-55 | 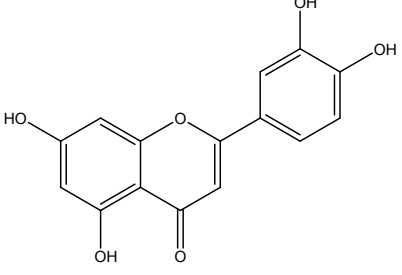   | 14 |
| Nat-56 |    | 14 |
| Nat-57 |    | 13 |
| Nat-58 |   | 13 |
| Nat-59 |  | 13 |
| Nat-60 |  | 13 |

|        |                                                                                     |    |
|--------|-------------------------------------------------------------------------------------|----|
| Nat-61 | 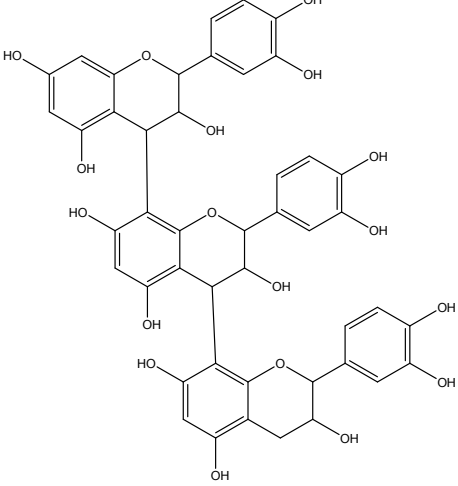   | 13 |
| Nat-62 |    | 13 |
| Nat-63 |   | 13 |
| Nat-64 |  | 3  |
| Nat-65 |  | 3  |

|        |                                                                                     |   |
|--------|-------------------------------------------------------------------------------------|---|
| Nat-66 | 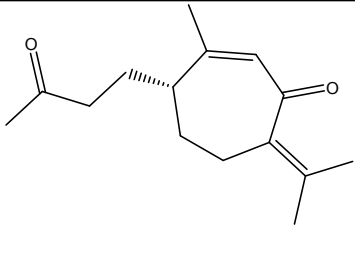   | 3 |
| Nat-67 |    | 3 |
| Nat-68 |    | 3 |
| Nat-69 |   | 3 |
| Nat-70 |  | 3 |
| Nat-71 |  | 3 |

|        |                                                                                     |   |
|--------|-------------------------------------------------------------------------------------|---|
| Nat-72 | 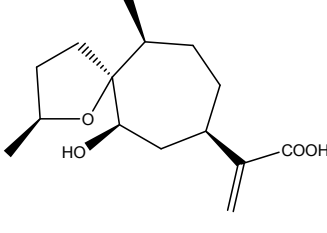   | 3 |
| Nat-73 |    | 3 |
| Nat-74 |    | 3 |
| Nat-75 |   | 3 |
| Nat-76 |  | 3 |

|               |  |          |
|---------------|--|----------|
| <p>Nat-77</p> |  | <p>3</p> |
| <p>Nat-78</p> |  | <p>3</p> |
| <p>Nat-79</p> |  | <p>3</p> |
| <p>Nat-80</p> |  | <p>3</p> |
| <p>Nat-81</p> |  | <p>3</p> |

|        |                                                                                     |   |
|--------|-------------------------------------------------------------------------------------|---|
| Nat-82 | 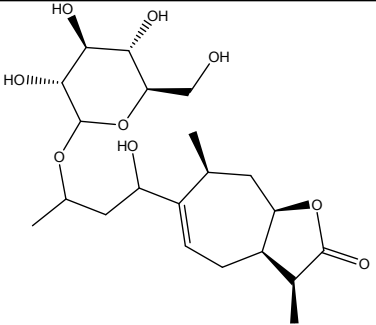   | 3 |
| Nat-83 |    | 3 |
| Nat-84 |    | 3 |
| Nat-85 |  | 3 |
| Nat-86 |  | 3 |
| Nat-87 |  | 3 |



|        |                                                                                     |   |
|--------|-------------------------------------------------------------------------------------|---|
| Nat-88 | 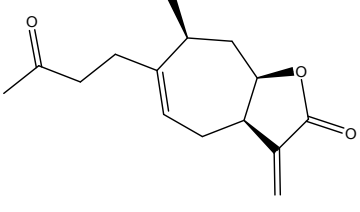   | 3 |
| Nat-89 |    | 3 |
| Nat-90 |    | 3 |
| Nat-91 |   | 3 |
| Nat-92 |  | 3 |
| Nat-93 |  | 3 |

|        |                                                                                     |   |
|--------|-------------------------------------------------------------------------------------|---|
| Nat-94 | 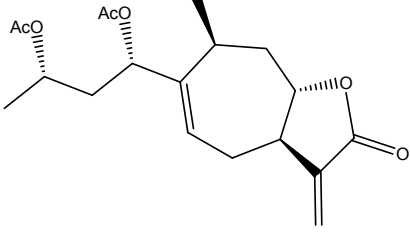   | 3 |
| Nat-95 |    | 3 |
| Nat-96 |    | 3 |
| Nat-97 |   | 3 |
| Nat-98 |  | 3 |

|         |                                                                                     |   |
|---------|-------------------------------------------------------------------------------------|---|
| Nat-99  | 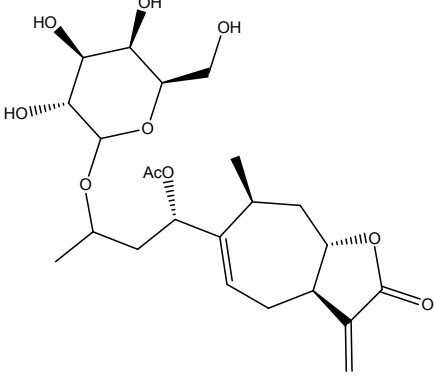   | 3 |
| Nat-100 |    | 3 |
| Nat-101 |   | 3 |
| Nat-102 |  | 3 |
| Nat-103 |  | 3 |

|         |                                                                                     |   |
|---------|-------------------------------------------------------------------------------------|---|
| Nat-104 | 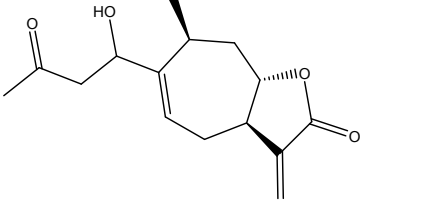   | 3 |
| Nat-105 |    | 3 |
| Nat-106 |    | 3 |
| Nat-107 |   | 3 |
| Nat-108 |  | 3 |
| Nat-109 |  | 3 |

|         |                                                                                     |   |
|---------|-------------------------------------------------------------------------------------|---|
| Nat-110 | 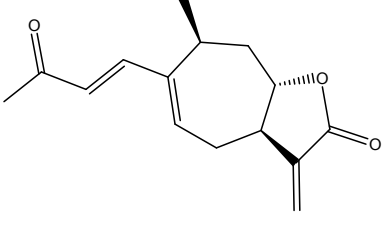   | 3 |
| Nat-111 |    | 3 |
| Nat-112 |    | 3 |
| Nat-113 |  | 3 |
| Nat-114 |  | 3 |
| Nat-115 |  | 3 |

|         |                                                                                     |   |
|---------|-------------------------------------------------------------------------------------|---|
| Nat-116 | 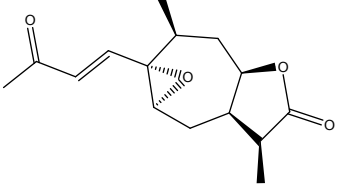   | 3 |
| Nat-117 |    | 3 |
| Nat-118 |    | 3 |
| Nat-119 |   | 3 |
| Nat-120 |  | 3 |
| Nat-121 |  | 3 |

|         |                                                                                     |   |
|---------|-------------------------------------------------------------------------------------|---|
| Nat122  | 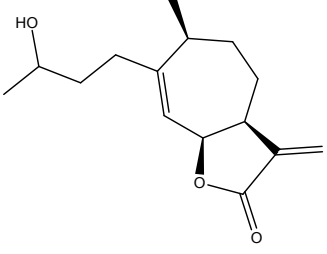   | 3 |
| Nat-123 |    | 3 |
| Nat-124 |   | 3 |
| Nat-125 |  | 3 |
| Nat-126 |  | 3 |

|         |                                                                                     |   |
|---------|-------------------------------------------------------------------------------------|---|
| Nat-127 | 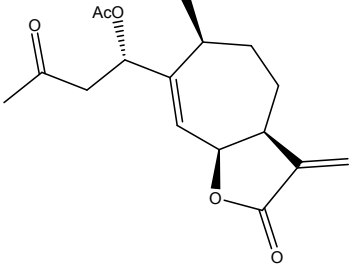   | 3 |
| Nat-128 |    | 3 |
| Nat-129 |   | 3 |
| Nat-130 |  | 3 |
| Nat-131 |  | 3 |



|         |                                                                                     |   |
|---------|-------------------------------------------------------------------------------------|---|
| Nat-132 | 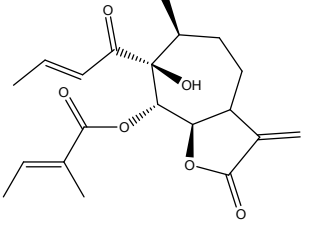   | 3 |
| Nat-133 |    | 3 |
| Nat-134 |    | 3 |
| Nat-135 |   | 3 |
| Nat-136 |  | 3 |
| Nat-137 |  | 3 |

|         |  |   |
|---------|--|---|
| Nat-138 |  | 3 |
| Nat-139 |  | 3 |
| Nat-140 |  | 3 |
| Nat-141 |  | 3 |
| Nat-142 |  | 3 |
| Nat-143 |  | 3 |

|         |  |   |
|---------|--|---|
| Nat-144 |  | 3 |
| Nat-145 |  | 3 |
| Nat-146 |  | 3 |
| Nat-147 |  | 3 |
| Nat-148 |  | 3 |

|         |                                                                                     |   |
|---------|-------------------------------------------------------------------------------------|---|
| Nat-149 | 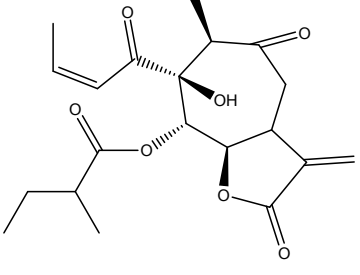   | 3 |
| Nat-150 |    | 3 |
| Nat-151 |    | 3 |
| Nat-152 |  | 3 |
| Nat-153 |  | 3 |
| Nat-154 |  | 3 |

|         |                                                                                     |   |
|---------|-------------------------------------------------------------------------------------|---|
| Nat-155 | 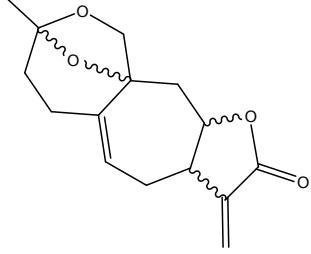   | 3 |
| Nat-156 |    | 3 |
| Nat-157 |    | 3 |
| Nat-158 |   | 3 |
| Nat-159 |  | 3 |
| Nat-160 |  | 3 |

|         |                                                                                     |   |
|---------|-------------------------------------------------------------------------------------|---|
| Nat-161 | 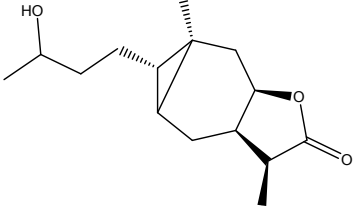   | 3 |
| Nat-162 |    | 3 |
| Nat-163 |   | 3 |
| Nat-164 |  | 3 |
| Nat-165 |  | 3 |

1. Ohkanda, J., Knowles, D.B., Blaskovich, M.A., Sebti, S., Hamilton, A.D., Inhibitors of protein farnesyltransferase as novel anticancer agents, *Cur. Topics Med. Chem.* 2002, 2, 303-323.
2. Ayral-Kaloustian, S., Salaski, E.J., Protein farnesyltransferase inhibitors, *Cur. Med. Chem.*, 2002, 9, 1003-1032.
3. Vasas, A., Hohmann, J., Xanthane sesquiterpenoids: structure, synthesis and biological activity, *Nat. Prod. Rep.*, 2011, 28, 824-842.
4. Balajee, R., Dhana Rajan, M. S., Molecular docking and simulation studies of farnesyl transferase with the potential inhibitor Theflavin, *J. Appl. Pharmaceut. Sci.*, 2011, 1(08), 141-148.
5. Dalsgaard, P.W., Petersen, B.O., Duus, J.O., Zidorn, C., Frisvad, J.C., Christophersen, C., Larsen, T.O., Atlantinone A, a meroterpenoid produced by *Penicillium ribeum* and several cheese associated *Penicillium* species. *Metabolites* 2012, 2, 214-220.
6. Omura, S., Inokoshi, J., Uchida, R., Shiomi, K., Masuma, R., Kawakubo, T., Tanakaf, H., Iwai, Y., Kosemurall, S., Yamamurall, S., Andrastins A ~ C, new protein farnesyltransferase inhibitors produced by penicillium sp. FO-3929. I. Producing strain, fermentation, isolation, and biological activities. *J. Antibiotics*, 1996, 49(5), 414-417.
7. Frassanito, M.A., Cusmai, A., Piccoli, C., Dammacco, F., Manumycin inhibits farnesyltransferase and induces apoptosis of drug-resistant interleukin 6-producing myeloma cells, *British J. Haematol.*, 2002, 118, 157-165.
8. Waldmann, H., Thutewohl, M., Ras-farnesyltransferase-inhibitors as promising anti-tumor drugs, *Topics Cur Chem.*, 2000, 211, 117-130.
9. Kwon, B.M., Lee, S.H., Kim, M.J., Kim, H.K., Kim, H.M., Isolation of farnesyltransferase inhibitors from herbal medicines, *Ann N Y Acad Sci.* 1999;886:261-4.
10. Ancuceanu, R.V., Istudor, V., Pharmacologically active natural compounds for lung cancer, *Altern Med Rev* 2004;9(4):402-419.
11. Longeon, A., Copp, B.R., Roué, M., Dubois, J., Valentin, A., Petek, S., Debitus, C., Bourguet-Kondracki, M.L., New bioactive halenaquinone derivatives from South Pacific marine sponges of the genus *Xestospongia*, *Bioorg. Med. Chem.* 18 (2010) 6006-6011.
12. Liu, C., Barbacid, M., Bulgar, M., Clark, J. M., Crosswell, A. R., Dean, L., Doyle, T. W., Fernandes, P. B., Huang, S., Manne, V., Pirnik, D. M., Wells, J. S., Meyers, E., O'-Desmethoxystreptonigrin, A novel analog of streptonigrin, *J. Antibiotics*, 1992, 45 (4), 454-457.
13. Tsuda, H., Ohshima, Y., Nomoto, H., Fujita, K., Matsuda, E., Iigo, M., Takasuka, N., Moore, M.A., Cancer prevention by natural products, *Drug Metab. Pharmacokin.* 19 (4), 245-263 (2004).

14. FT-73. Amin, A.R.M.R., Kucuk, O., Khuri, F.R., Shin, D.M., Perspectives for cancer prevention with natural compounds, J Clin Oncol 2009, 27, 2712-2725.

**Table S2: Validation results of REN inhibitors**

| BindingDB ID | Ki ( $\mu\text{M}$ ) | $\Delta G_{\text{bind}}$ (kcal/mol) | Predicted $\Delta G_{\text{bind}}$ (kcal/mol) |          |           |          |          |           |          |          |
|--------------|----------------------|-------------------------------------|-----------------------------------------------|----------|-----------|----------|----------|-----------|----------|----------|
|              |                      |                                     | Model 1                                       |          | Model 2   |          |          | Model 3   |          |          |
|              |                      |                                     | Predicted                                     | LOO      | Predicted | LOO      | Test     | Predicted | LOO      | Test     |
| 912          | 13                   | -6.67                               | -9.3041                                       | -4.0002  | -8.9500   | -4.3399  | --       | -9.0764   | -4.2164  | --       |
| 17941        | 0.0007               | -12.49                              | -9.3590                                       | -15.6642 | -9.0144   | -16.0440 | --       | -9.1381   | -15.9095 | --       |
| 21642        | 0.0017               | -11.96                              | -9.3590                                       | -14.5969 | --        | --       | -11.0143 | --        | --       | -9.1381  |
| 32392        | 5.7                  | -7.15                               | -9.3350                                       | -4.9351  | -8.9862   | -5.2730  | --       | -9.1110   | -5.1499  | --       |
| 32394        | 16                   | -6.54                               | -9.2914                                       | -3.7515  | --        | --       | -8.9352  | -9.0621   | -3.9686  | --       |
| 50012322     | 0.000051             | -14.04                              | -9.3590                                       | -18.7856 | --        | --       | -9.0144  | --        | --       | -12.1381 |
| 50017487     | 1                    | -8.18                               | -9.3548                                       | -6.9890  | -9.0094   | -7.3319  | --       | -9.1333   | -7.2075  | --       |
| 50021129     | 0.0012               | -12.17                              | -9.3590                                       | -15.0198 | -9.0144   | -15.3968 | --       | -9.1381   | -15.2630 | --       |
| 50022507     | 0.008                | -11.05                              | -9.3590                                       | -12.7643 | --        | --       | -9.0143  | --        | --       | -9.1380  |
| 50022512     | 0.099                | -9.55                               | -9.3586                                       | -9.7440  | -9.0139   | -10.0982 | --       | -9.1376   | -9.9707  | --       |
| 50022515     | 1.1                  | -8.13                               | -9.3544                                       | -6.8887  | -9.0089   | -7.2313  | --       | -9.1329   | -7.1070  | --       |
| 50022517     | 1.7                  | -7.87                               | -9.3519                                       | -6.3677  | -9.0059   | -6.7085  | --       | -9.1300   | -6.5847  | --       |
| 50022519     | 0.016                | -10.63                              | -9.3590                                       | -11.9186 | -9.0143   | -12.2821 | --       | --        | --       | -9.1380  |
| 50022520     | 0.009                | -10.98                              | -9.3590                                       | -12.6234 | --        | --       | -9.0143  | --        | --       | -9.1380  |
| 50022905     | 2                    | -7.77                               | -9.3506                                       | -6.1676  | --        | --       | -9.0045  | --        | --       | -9.1286  |



|          |          |        |         |          |         |          |          |         |          |         |
|----------|----------|--------|---------|----------|---------|----------|----------|---------|----------|---------|
| 50023050 | 0.052    | -9.94  | -9.3588 | -10.5292 | -9.0141 | -10.8868 | --       | -9.1378 | -10.7583 | --      |
| 50023051 | 0.154    | -9.29  | -9.3583 | -9.2207  | -9.0136 | -9.5726  | --       | -9.1373 | -9.4457  | --      |
| 50023052 | 1.2      | -8.08  | -9.3540 | -6.7885  | -9.0084 | -7.1307  | --       | -9.1324 | -7.0065  | --      |
| 50023053 | 0.12     | -9.44  | -9.3585 | -9.5226  | --      | --       | -9.0138  | --      | --       | -9.1375 |
| 50023054 | 0.007    | -11.12 | -9.3590 | -12.9050 | --      | --       | -9.0143  | --      | --       | -9.1380 |
| 50023055 | 16       | -6.54  | -9.2915 | -3.7515  | --      | --       | -8.9352  | -9.0621 | -3.9686  | --      |
| 50023056 | 12       | -6.71  | -9.3084 | -4.0764  | -8.9550 | -4.4157  | --       | -9.0811 | -4.2922  | --      |
| 50025931 | 0.0048   | -11.35 | -9.3590 | -13.3685 | --      | --       | -9.0143  | -9.1380 | -13.6065 | --      |
| 50025932 | 0.0036   | -11.52 | -9.3590 | -13.7108 | --      | --       | -9.0143  | -9.1381 | -13.9499 | --      |
| 50025933 | 0.043    | -10.05 | -9.3589 | -10.7507 | -9.0142 | -11.1092 | --       | -9.1379 | -10.9805 | --      |
| 50025934 | 0.000064 | -13.91 | -9.3590 | -16.5238 | --      | --       | -9.0144  | --      | --       | -9.1381 |
| 50025935 | 0.000026 | -14.44 | -9.3590 | -16.5911 | --      | --       | -12.0144 | -9.1381 | -16.8487 | --      |
| 50025937 | 0.00052  | -12.66 | -9.3590 | -16.0065 | --      | --       | -9.0144  | -9.1381 | -16.2529 | --      |
| 50025939 | 0.049    | -9.97  | -9.3588 | -10.5896 | -9.0141 | -10.9474 | --       | -9.1378 | -10.8189 | --      |
| 50025940 | 0.21     | -9.11  | -9.3587 | -8.8584  | -9.0133 | -9.2089  | --       | -9.1371 | -9.0824  | --      |
| 50025941 | 0.0011   | -12.22 | -9.3590 | -15.1205 | -9.0144 | -15.4979 | --       | -9.1381 | -15.3640 | --      |
| 50025942 | 0.19     | -9.17  | -9.3582 | -8.9792  | -9.0134 | -9.3301  | --       | -9.1372 | -9.2035  | --      |
| 50025943 | 4.1      | -7.35  | -9.3417 | -5.3310  | -8.9941 | -5.6692  | --       | -9.1186 | -5.5461  | --      |
| 50025944 | 0.58     | -8.51  | -9.3566 | -7.6517  | -9.0115 | -7.9972  | --       | -9.1353 | -7.8721  | --      |
| 50025945 | 0.00088  | -12.35 | -9.3590 | -15.3823 | -9.0144 | -15.7608 | --       | -9.1381 | -15.6266 | --      |
| 50025946 | 0.0077   | -11.07 | -9.3590 | -12.8046 | --      | --       | -9.0143  | -9.1380 | -13.0409 | --      |
| 50025948 | 0.014    | -10.71 | -9.3590 | -12.0797 | --      | --       | -9.0143  | --      | --       | -9.1380 |
| 50025949 | 0.93     | -8.23  | -9.3551 | -7.0894  | --      | --       | -9.0098  | -9.1337 | -7.3082  | --      |
| 50027353 | 0.8      | -8.32  | -9.3557 | -7.2700  | -9.0104 | -7.6141  | --       | --      | --       | -9.1343 |
| 50027354 | 2.5      | -7.64  | -9.3485 | -5.9080  | --      | --       | -9.0020  | -9.1262 | -6.1240  | --      |

|          |        |        |         |          |         |          |         |         |          |         |
|----------|--------|--------|---------|----------|---------|----------|---------|---------|----------|---------|
| 50027355 | 2.2    | -7.72  | -9.3497 | -6.0678  | --      | --       | -9.0035 | -9.1276 | -6.2841  | --      |
| 50027356 | 42     | -5.97  | -9.1816 | -2.7167  | -8.8065 | -3.0745  | --      | -8.9387 | -2.9459  | --      |
| 50027357 | 0.8    | -8.32  | -9.3557 | -7.2701  | -9.0104 | -7.6141  | --      | --      | --       | -9.1343 |
| 50027358 | 0.6    | -8.49  | -9.3565 | -7.6115  | --      | --       | -9.0114 | -9.1352 | -7.8318  | --      |
| 50027359 | 0.1    | -9.55  | -9.3586 | -9.7440  | -9.0139 | -10.0982 | --      | -9.1376 | -9.9707  | --      |
| 50027360 | 0.1    | -9.55  | -9.3586 | -9.7440  | -9.0139 | -10.0982 | --      | -9.1376 | -9.9707  | --      |
| 50027361 | 1      | -8.18  | -9.3548 | -6.9890  | -9.0094 | -7.3319  | --      | -9.1333 | -7.2075  | --      |
| 50027362 | 0.001  | -12.28 | -9.3590 | -15.2413 | -9.0144 | -15.6193 | --      | --      | --       | -9.1381 |
| 50027364 | 4      | -7.36  | -9.3426 | -5.3507  | --      | --       | -8.9946 | --      | --       | -9.1191 |
| 50027365 | 0.3    | -8.9   | -9.3578 | -8.4359  | -9.0129 | -8.7846  | --      | --      | --       | -9.1366 |
| 50027895 | 1000   | -4.09  | -5.1342 | -2.9893  | -4.0154 | -4.1741  | --      | -4.3906 | -3.7656  | --      |
| 50028489 | 670    | -4.33  | -6.5284 | -2.0735  | -5.6982 | -2.8874  | --      | -5.9573 | -2.6429  | --      |
| 50028490 | 600    | -4.39  | -6.8241 | -1.9012  | -6.0447 | -2.6612  | --      | -6.2896 | -2.4316  | --      |
| 50028491 | 1780   | -3.75  | -1.8388 | -6.0343  | -0.2043 | -5.3290  | --      | -0.6876 | -7.7881  | --      |
| 50028492 | 1140   | -4.01  | -4.5427 | -3.4396  | -3.3720 | -4.7553  | --      | -3.7260 | -4.3240  | --      |
| 50028493 | 230    | -4.96  | -8.3873 | -1.4919  | -7.8760 | -1.9886  | --      | -8.0462 | -1.8239  | --      |
| 50028494 | 530    | -4.47  | -7.1199 | -1.7694  | -6.3911 | -2.4782  | --      | -6.6219 | -2.2619  | --      |
| 50028495 | 980    | -4.1   | -5.2187 | -2.9232  | -4.1639 | -4.0286  | --      | -4.4856 | -3.6852  | --      |
| 50028496 | 300    | -4.81  | -8.0916 | -1.4871  | -7.5295 | -2.0337  | --      | --      | --       | -7.7138 |
| 50028527 | 2440   | -3.56  | 0.9496  | -6.1397  | --      | --       | -3.0624 | --      | --       | -2.4457 |
| 50028528 | 1010   | -4.09  | -5.0919 | -3.0328  | --      | --       | -4.0154 | -4.3431 | -3.8164  | --      |
| 50077669 | 0.0007 | -12.49 | -9.3590 | -15.6642 | -9.0144 | -16.0440 | --      | -9.1381 | -15.9095 | --      |
| 50084688 | 0.014  | -10.71 | -9.3590 | -12.0797 | --      | --       | -9.0143 | -9.1380 | -12.3137 | --      |
| 50139109 | 1.9    | -7.8   | -9.3510 | -6.2276  | -9.0050 | -6.5680  | --      | --      | --       | -9.1290 |
| 50139110 | 24.4   | -6.29  | -9.2560 | -3.2846  | -8.8936 | -3.6305  | --      | -9.0222 | -3.5052  | --      |

|          |          |        |         |          |         |          |          |         |          |          |
|----------|----------|--------|---------|----------|---------|----------|----------|---------|----------|----------|
| 50139111 | 73.6     | -5.64  | -9.0481 | -2.1893  | -8.6501 | -2.5703  | --       | -8.7886 | -2.4353  | --       |
| 50139112 | 10.9     | -6.77  | -9.3130 | -4.1925  | --      | --       | -8.9604  | -9.0863 | -4.4080  | --       |
| 50281636 | 0.212    | -9.1   | -9.3586 | -8.8383  | -9.0133 | -9.1886  | --       | --      | --       | -9.1371  |
| 50281638 | 0.002    | -11.87 | -9.3590 | -14.4156 | -9.0144 | -14.7900 | --       | -9.1381 | -14.6570 | --       |
| 50281642 | 1.2      | -8.08  | -9.3540 | -6.7885  | --      | --       | -9.0084  | --      | --       | -9.1324  |
| 50333943 | 0.021    | -10.47 | -9.3590 | -11.5964 | -9.0143 | -11.9586 | --       | --      | --       | -9.1380  |
| 50333944 | 0.094    | -9.59  | -9.3586 | -9.8246  | -9.0139 | -10.1791 | --       | --      | --       | -9.1376  |
| 50333947 | 0.34     | -8.82  | -9.3576 | -8.2750  | -9.0127 | -8.6230  | --       | -9.1364 | -8.4972  | --       |
| 50333948 | 0.13     | -9.39  | -9.3585 | -9.4219  | -9.0137 | -9.7748  | --       | -9.1374 | -9.6476  | --       |
| 50333949 | 0.45     | -8.66  | -9.3571 | -7.9532  | -9.0121 | -8.2999  | --       | -9.1359 | -8.1745  | --       |
| 50333951 | 0.94     | -8.22  | -9.3551 | -7.0693  | -9.0097 | -7.4125  | --       | -9.1336 | -7.2880  | --       |
| 50366324 | 0.002    | -11.87 | -9.3590 | -14.4156 | -9.0144 | -14.7900 | --       | -9.1381 | -14.6570 | --       |
| 50367081 | 230      | -4.96  | -8.3873 | -3.4919  | --      | --       | -7.8760  | -8.0461 | -1.8239  | --       |
| 50367082 | 1520     | -3.84  | -2.9373 | -4.8635  | --      | --       | -1.4916  | -1.9219 | -6.1599  | --       |
| 50367083 | 1140     | -4.01  | -4.5427 | -3.4396  | --      | --       | -3.3720  | -3.7260 | -4.3240  | --       |
| 50367084 | 440      | -4.58  | -7.5001 | -1.6137  | -6.8366 | -2.2586  | --       | -7.0492 | -2.0582  | --       |
| 50367085 | 960      | -4.12  | -5.3032 | -2.8778  | -4.2629 | -3.9610  | --       | -4.5805 | -3.6261  | --       |
| 50367086 | 520      | -4.48  | -7.1621 | -1.7477  | -6.4406 | -2.4492  | --       | -6.6694 | -2.2348  | --       |
| 50368274 | 0.000043 | -14.14 | -9.3590 | -16.9870 | --      | --       | -9.0144  | --      | --       | -12.1381 |
| 50368278 | 0.00004  | -14.18 | -9.3590 | -17.0675 | --      | --       | -12.0144 | -9.1381 | -16.3235 | --       |
| 50405192 | 0.018    | -10.56 | -9.3590 | -11.7776 | -9.0143 | -12.1406 | --       | -9.1380 | -12.0107 | --       |

**Table S3: Validation results of ACE inhibitors**

| BindingDB MonomerID | Ki ( $\mu\text{M}$ ) | $\Delta G_{\text{bind}}$ (kcal/mol) | Predicted $\Delta G_{\text{bind}}$ (kcal/mol) |          |           |          |          |           |          |          |
|---------------------|----------------------|-------------------------------------|-----------------------------------------------|----------|-----------|----------|----------|-----------|----------|----------|
|                     |                      |                                     | Model A                                       |          | Model B   |          |          | Model C   |          |          |
|                     |                      |                                     | Predicted                                     | LOO      | Predicted | LOO      | Test     | Predicted | LOO      | Test     |
| 21642               | 0.0017               | -11.96                              | -10.2945                                      | -13.6556 | --        | --       | -10.5040 | -10.2593  | -13.7071 | --       |
| 50011270            | 0.0012               | -12.17                              | -10.2946                                      | -14.0794 | -10.5041  | -13.8792 | --       | -10.2593  | -14.1328 | --       |
| 50018848            | 0.015                | -10.67                              | -10.2940                                      | -11.0528 | -10.5030  | -10.8414 | --       | --        | --       | -10.2588 |
| 50018850            | 0.0004               | -12.82                              | -10.2946                                      | -14.3912 | -10.5041  | -15.1960 | --       | --        | --       | -11.2593 |
| 50020843            | 0.0014               | -12.08                              | -10.2946                                      | -13.8978 | --        | --       | -10.5041 | -10.2593  | -13.9503 | --       |
| 50021114            | 0.0014               | -12.08                              | -10.2946                                      | -13.8978 | -10.5041  | -13.6969 | --       | -10.2593  | -13.9503 | --       |
| 50021116            | 0.008                | -11.05                              | -10.2943                                      | -11.8194 | -10.5035  | -11.6107 | --       | -10.2590  | -11.8625 | --       |
| 50021117            | 55                   | -5.81                               | -8.1757                                       | -4.3598  | -6.1618   | -5.4025  | --       | -8.3296   | -3.1864  | --       |
| 50021118            | 0.0012               | -12.17                              | -10.2946                                      | -14.0794 | -10.5041  | -13.8792 | --       | -10.2593  | -14.1328 | --       |
| 50021119            | 0.0005               | -12.69                              | -10.2946                                      | -15.1288 | -10.5041  | -14.9326 | --       | --        | --       | -10.2593 |
| 50021120            | 42                   | -5.97                               | -8.6765                                       | -5.1950  | -7.1882   | -4.6435  | --       | -8.7857   | -3.0661  | --       |
| 50021121            | 0.0014               | -12.08                              | -10.2946                                      | -13.8978 | -10.5041  | -13.6969 | --       | -10.2593  | -13.9503 | --       |
| 50021122            | 0.8                  | -8.32                               | -10.2638                                      | -6.3414  | --        | --       | -10.4410 | -10.2313  | -6.3573  | --       |
| 50021123            | 0.0012               | -12.17                              | -10.2946                                      | -14.0794 | -10.5041  | -13.8792 | --       | --        | --       | -10.2593 |
| 50021124            | 0.0026               | -11.71                              | -10.2945                                      | -13.1512 | -10.5040  | -12.9473 | --       | -10.2592  | -13.2003 | --       |
| 50024096            | 0.13                 | -9.39                               | -10.2896                                      | -8.4741  | -10.4939  | -8.2576  | --       | -10.2548  | -8.5017  | --       |
| 50027141            | 0.1                  | -9.55                               | -10.2908                                      | -8.7958  | -10.4963  | -8.5792  | --       | -10.2558  | -8.8250  | --       |
| 50027353            | 0.1                  | -9.55                               | -10.2908                                      | -8.7958  | --        | --       | -10.4963 | --        | --       | -10.2558 |
| 50036060            | 94                   | -5.49                               | -6.6732                                       | -4.1959  | -3.0827   | -6.5582  | --       | -6.9612   | -3.8725  | --       |
| 50044868            | 0.000004             | -15.55                              | -10.2946                                      | -16.9006 | --        | --       | -10.5042 | --        | --       | -12.2593 |
| 50044869            | 0.002                | -11.87                              | -10.2945                                      | -13.474  | -10.5040  | -13.2715 | --       | --        | --       | -10.2592 |
| 50047222            | 70                   | -5.67                               | -7.5978                                       | -3.6400  | -4.9775   | -6.5603  | --       | -7.8033   | -3.4123  | --       |
| 50073120            | 0.006                | -11.22                              | -10.2944                                      | -12.1624 | --        | --       | -10.5037 | -10.2591  | -12.2071 | --       |

|          |         |        |          |          |          |          |          |          |          |          |
|----------|---------|--------|----------|----------|----------|----------|----------|----------|----------|----------|
| 50084628 | 0.0098  | -10.92 | -10.2942 | -11.5571 | -10.5034 | -11.3474 | --       | -10.2590 | -11.5990 | --       |
| 50121928 | 50      | -5.87  | -8.3683  | -3.2937  | -6.5566  | -5.0956  | --       | --       | --       | -8.5050  |
| 50155447 | 250.2   | -4.91  | -0.6554  | -6.0716  | --       | --       | -6.2496  | -1.4807  | -5.4157  | --       |
| 50189452 | 7       | -7.03  | -10.0249 | -5.9854  | -9.9515  | -4.0433  | --       | --       | --       | -10.0137 |
| 50189454 | 26.3    | -6.25  | -9.2814  | -5.1641  | -8.4277  | -3.9841  | --       | --       | --       | -9.3365  |
| 50279944 | 0.01    | -10.91 | -10.2942 | -11.5369 | --       | --       | -10.5034 | -10.2590 | -11.5788 | --       |
| 50281462 | 50      | -5.87  | -8.3683  | -3.2937  | --       | --       | -6.5566  | -8.5050  | -3.1377  | --       |
| 50281463 | 0.35    | -8.81  | -10.2811 | -7.3124  | -10.4765 | -7.1007  | --       | --       | --       | -10.2470 |
| 50281632 | 0.0017  | -11.96 | -10.2945 | -13.6556 | -10.5040 | -13.4538 | --       | -10.2593 | -13.7071 | --       |
| 50286715 | 0.03    | -10.26 | -10.2934 | -10.2259 | -10.5018 | -10.0119 | --       | -10.2583 | -10.2618 | --       |
| 50286724 | 0.52    | -8.57  | -10.2746 | -6.8348  | -10.4631 | -6.6286  | --       | -10.2411 | -6.8538  | --       |
| 50292544 | 14.2    | -6.61  | -9.7475  | -3.4218  | -9.3831  | -3.7699  | --       | --       | --       | -8.7611  |
| 50292546 | 126     | -5.32  | -5.4403  | -5.1781  | --       | --       | -3.5562  | -5.8384  | -4.7043  | --       |
| 50292547 | 34.2    | -6.09  | -8.9770  | -5.1425  | --       | --       | -7.8040  | -9.0594  | -3.0394  | --       |
| 50303319 | 0.00041 | -12.81 | -10.2946 | -14.3710 | --       | --       | -10.5041 | -10.2593 | -15.4302 | --       |
| 50303321 | 0.0004  | -12.82 | -10.2946 | -14.3912 | -10.5041 | -15.1960 | --       | -10.2593 | -15.4504 | --       |
| 50303324 | 0.013   | -10.76 | -10.2941 | -11.2343 | --       | --       | -10.5031 | --       | --       | -10.2589 |
| 50303325 | 0.005   | -11.32 | -10.2944 | -12.3642 | -10.5038 | -12.1574 | --       | -10.2591 | -12.4098 | --       |
| 50303329 | 0.025   | -10.37 | -10.2936 | -10.4477 | -10.5022 | -10.2344 | --       | -10.2584 | -10.4846 | --       |
| 50303330 | 0.012   | -10.8  | -10.2941 | -11.3150 | -10.5032 | -11.1045 | --       | --       | --       | -10.2589 |
| 50303331 | 0.02    | -10.5  | -10.2938 | -10.7099 | -10.5026 | -10.4973 | --       | -10.2586 | -10.7480 | --       |
| 50367249 | 0.0005  | -12.69 | -10.2946 | -15.1288 | -10.5041 | -14.9326 | --       | -10.2593 | -15.1869 | --       |
| 50367254 | 0.0014  | -12.08 | -10.2946 | -13.8978 | --       | --       | -10.5041 | -10.2593 | -13.9503 | --       |
| 50369460 | 0.00016 | -13.36 | -10.2946 | -14.4810 | -10.5042 | -16.2900 | --       | --       | --       | -11.2593 |
| 50411605 | 0.49    | -8.61  | -10.2757 | -6.9143  | --       | --       | -10.4655 | -10.2421 | -6.9337  | --       |

|          |        |        |          |          |          |          |          |          |          |          |
|----------|--------|--------|----------|----------|----------|----------|----------|----------|----------|----------|
| 50411722 | 0.016  | -10.63 | -10.2940 | -10.9721 | -10.5029 | -10.7604 | --       | -10.2588 | -11.0114 | --       |
| 50411723 | 0.21   | -9.11  | -10.2865 | -7.9122  | -10.4876 | -7.6969  | --       | -10.2520 | -7.9371  | --       |
| 50411724 | 0.84   | -8.29  | -10.2622 | -6.2825  | -10.4379 | -6.0880  | --       | -10.2299 | -6.2980  | --       |
| 50411725 | 2.7    | -7.6   | -10.1906 | -4.9643  | --       | --       | -10.2910 | -10.1646 | -4.9681  | --       |
| 50411727 | 13     | -6.67  | -9.7938  | -5.4958  | -9.4778  | -3.7963  | --       | --       | --       | -9.8032  |
| 50411728 | 0.62   | -8.47  | -10.2707 | -6.6370  | -10.4552 | -6.4343  | --       | -10.2376 | -6.6547  | --       |
| 50411729 | 0.2    | -9.14  | -10.2869 | -7.9724  | -10.4884 | -7.7569  | --       | -10.2523 | -7.9975  | --       |
| 50411730 | 0.0093 | -10.96 | -10.2942 | -11.6378 | -10.5034 | -11.4284 | --       | --       | --       | -10.2590 |
| 50411731 | 0.0086 | -11    | -10.2943 | -11.7185 | -10.5035 | -11.5094 | --       | --       | --       | -10.2590 |
| 50411732 | 3.4    | -7.46  | -10.1636 | -5.7098  | -10.2357 | -4.6190  | --       | --       | --       | -10.1400 |
| 50411733 | 0.2    | -9.14  | -10.2869 | -7.9724  | --       | --       | -10.4884 | -10.2523 | -7.9975  | --       |
| 50411734 | 0.021  | -10.47 | -10.2938 | -10.6494 | -10.5025 | -10.4367 | --       | -10.2586 | -10.6872 | --       |
| 50411735 | 0.093  | -9.59  | -10.2910 | -8.8763  | -10.4968 | -8.6597  | --       | --       | --       | -10.2561 |
| 50411736 | 0.0032 | -11.59 | -10.2945 | -12.9090 | -10.5039 | -12.7043 | --       | -10.2592 | -12.9570 | --       |
| 50411737 | 0.7    | -8.4   | -10.2676 | -6.4989  | -10.4489 | -6.2992  | --       | -10.2348 | -6.5158  | --       |

**Table S4:  $\Delta G_{\text{bind}}$  values of natural compounds calculated from docking and correlation studies**

| REN           |                      |                                     |                      |         |         |         | ACE           |                      |                                     |                      |          |          |          |
|---------------|----------------------|-------------------------------------|----------------------|---------|---------|---------|---------------|----------------------|-------------------------------------|----------------------|----------|----------|----------|
| Inhibitor     | Ki ( $\mu\text{M}$ ) | $\Delta G_{\text{bind}}$ (kcal/mol) |                      |         |         |         | Inhibitor     | Ki ( $\mu\text{M}$ ) | $\Delta G_{\text{bind}}$ (kcal/mol) |                      |          |          |          |
|               |                      | Docking                             | Correlation Analysis |         |         |         |               |                      | Docking                             | Correlation Analysis |          |          |          |
|               |                      |                                     | Model 1              | Model 2 | Model 3 | Average |               |                      |                                     | Model A              | Model B  | Model C  | Average  |
| <b>Nat-20</b> | 1.46E-02             | -10.69                              | -9.3590              | -9.0143 | -9.1380 | -9.1704 | <b>Nat-34</b> | 7.10E-04             | -12.48                              | -10.2946             | -10.5041 | -10.2593 | -10.3527 |
| <b>Nat-38</b> | 1.94E-02             | -10.52                              | -9.3590              | -9.0143 | -9.1380 | -9.1704 | <b>Nat-7</b>  | 7.72E-04             | -12.43                              | -10.2946             | -10.5041 | -10.2593 | -10.3527 |

|                |          |        |         |         |         |         |                |          |        |          |          |          |          |
|----------------|----------|--------|---------|---------|---------|---------|----------------|----------|--------|----------|----------|----------|----------|
| <b>Nat-39</b>  | 4.15E-02 | -10.07 | -9.3590 | -9.0141 | -9.1379 | -9.1703 | <b>Nat-6</b>   | 1.20E-03 | -12.17 | -10.2946 | -10.5041 | -10.2593 | -10.3527 |
| <b>Nat-59</b>  | 3.06E-02 | -10.25 | -9.3589 | -9.0142 | -9.1379 | -9.1703 | <b>Nat-31</b>  | 6.82E-03 | -11.14 | -10.2943 | -10.5036 | -10.2591 | -10.3523 |
| <b>NLC-1</b>   | 6.33E-02 | -9.82  | -9.3588 | -9.0140 | -9.1378 | -9.1702 | <b>Nat-59</b>  | 7.54E-03 | -11.08 | -10.2943 | -10.5036 | -10.2591 | -10.3523 |
| <b>Nat-165</b> | 6.43E-02 | -9.81  | -9.3588 | -9.0140 | -9.1378 | -9.1702 | <b>NLC-1</b>   | 1.38E-02 | -10.72 | -10.2941 | -10.5031 | -10.2588 | -10.352  |
| <b>Nat-7</b>   | 7.36E-02 | -9.73  | -9.3587 | -9.0140 | -9.1377 | -9.1702 | <b>Nat-61</b>  | 2.11E-02 | -10.47 | -10.2938 | -10.5025 | -10.2586 | -10.3516 |
| <b>Nat-19</b>  | 8.43E-02 | -9.65  | -9.3587 | -9.0139 | -9.1377 | -9.1701 | <b>Nat-69</b>  | 2.26E-02 | -10.43 | -10.2937 | -10.5024 | -10.2585 | -10.3515 |
| <b>Nat-132</b> | 8.72E-02 | -9.63  | -9.3587 | -9.0139 | -9.1377 | -9.1701 | <b>Nat-72</b>  | 2.34E-02 | -10.41 | -10.2937 | -10.5023 | -10.2585 | -10.3515 |
| <b>Nat-14</b>  | 1.63E-01 | -9.26  | -9.3584 | -9.0135 | -9.1373 | -9.1697 | <b>Nat-10</b>  | 2.46E-02 | -10.38 | -10.2937 | -10.5022 | -10.2585 | -10.3515 |
| <b>Nat-12</b>  | 1.77E-01 | -9.21  | -9.3583 | -9.0135 | -9.1372 | -9.1697 | <b>Nat-47</b>  | 2.81E-02 | -10.3  | -10.2935 | -10.5019 | -10.2583 | -10.3512 |
| <b>Nat-77</b>  | 2.21E-01 | -9.08  | -9.3581 | -9.0133 | -9.1370 | -9.1695 | <b>Nat-165</b> | 2.86E-02 | -10.29 | -10.2935 | -10.5019 | -10.2583 | -10.3512 |
| <b>Nat-15</b>  | 2.28E-01 | -9.06  | -9.3581 | -9.0132 | -9.1370 | -9.1694 | <b>Nat-38</b>  | 2.96E-02 | -10.27 | -10.2935 | -10.5018 | -10.2583 | -10.3512 |
| <b>Nat-99</b>  | 2.28E-01 | -9.06  | -9.3581 | -9.0132 | -9.1370 | -9.1694 | <b>Nat-39</b>  | 3.45E-02 | -10.18 | -10.2933 | -10.5014 | -10.2581 | -10.3509 |
| <b>Nat-141</b> | 2.32E-01 | -9.05  | -9.3581 | -9.0132 | -9.1370 | -9.1694 | <b>Nat-40</b>  | 3.50E-02 | -10.17 | -10.2933 | -10.5014 | -10.2581 | -10.3509 |
| <b>Nat-23</b>  | 2.53E-01 | -9     | -9.3580 | -9.0131 | -9.1370 | -9.1693 | <b>Nat-67</b>  | 3.69E-02 | -10.14 | -10.2932 | -10.5013 | -10.2580 | -10.3508 |
| <b>Nat-24</b>  | 2.66E-01 | -8.97  | -9.3579 | -9.0130 | -9.1368 | -9.1693 | <b>Nat-19</b>  | 4.08E-02 | -10.08 | -10.2930 | -10.5009 | -10.2579 | -10.3506 |
| <b>Nat-81</b>  | 2.89E-01 | -8.92  | -9.3578 | -9.0129 | -9.1367 | -9.1692 | <b>Nat-24</b>  | 4.08E-02 | -10.08 | -10.2930 | -10.5009 | -10.2579 | -10.3506 |
| <b>Nat-22</b>  | 2.89E-01 | -8.92  | -9.3578 | -9.0129 | -9.1367 | -9.1692 | <b>Nat-68</b>  | 5.25E-02 | -9.93  | -10.2926 | -10.5000 | -10.2575 | -10.35   |
| <b>Nat-163</b> | 2.99E-01 | -8.9   | -9.3578 | -9.0129 | -9.1367 | -9.1691 | <b>Nat-99</b>  | 5.25E-02 | -9.93  | -10.2926 | -10.5000 | -10.2575 | -10.35   |
| <b>Nat-82</b>  | 3.25E-01 | -8.85  | -9.3577 | -9.0128 | -9.1365 | -9.1690 | <b>Nat-15</b>  | 5.43E-02 | -9.91  | -10.2925 | -10.4999 | -10.2574 | -10.3499 |
